# Supplementary material
Source: PubMed Central journal article supplement (PMC4526340)
Supplement: NIHMS705156-supplement-01.pdf [file NIHMS705156-supplement-01.pdf]

**Fig. 5**

Chromatin immunoprecipitation data of the ENCODE project, for binding of transcription factors NF- $\kappa$ B RelA, STAT3, and c-Myc. A: on human chromosome 8q24.21 locus of the *myc* gene . B: On the chromosome 19q13.2, locus of the *tgfb1* gene (red zone).

**Supporting information**

**Supplementary Table S1 Legend**

Few, partly representative proteins that interact with subunits of the IKK protein complex. Unless otherwise indicated, one referred article is given in column B. Columns G through J (green area) list an indicated involvement for each individual IKK-interaction partner in stress responses, in cells of the immune system, and of the nervous system, and in lesser differentiated cells (mesenchymal or stem cells).
